# Supplementary material for: Eccentric magnetic microcapsules for MRI-guided local administration and pH-regulated drug release
Source: Royal Society of Chemistry journal article supplement (doi:10.1039/c8ra08501c), 2018-01-01
Supplement: c8ra08501c1.pdf [file c8ra08501c1.pdf]

Supporting information for

## **Eccentric Magnetic Microcapsules for MRI-guided Local Administration and pH-regulated Drug Release**

Jingxian Huang<sup>a†</sup>, Wenwei Huang<sup>a†</sup>, Yin Chen<sup>a\*</sup>, Yu Shrike Zhang<sup>b</sup>, Jinshuang Zhong<sup>a</sup>,  
<sup>c</sup>, Yan Li<sup>a</sup> and Jianhua Zhou<sup>a\*</sup>

<sup>a</sup> J. Huang, W. Huang, Dr. Y. Chen, J. Zhong, Dr. Y. Li, Prof. J. Zhou

School of Biomedical Engineering, and The First Affiliated Hospital, Sun Yat-sen  
University,  
Guangzhou 510006, China

<sup>b</sup> Prof. Y. S. Zhang

Division of Engineering in Medicine, Department of Medicine, Brigham and  
Women's Hospital, Harvard Medical School, 65 Landsdowne Street, Cambridge,  
Massachusetts 02139, United States

<sup>c</sup> Mr. J. Zhong

Imaging Department, Sun Yat-sen University Cancer Center, Sun Yat-sen  
University, Guangzhou 510080, China

\*Corresponding authors. Tel.: +86 20 39387890; Fax: +86 20 39387890.

E-mail addresses:

chenyin8@mail.sysu.edu.cn (Y. Chen); zhoujh33@mail.sysu.edu.cn (J.H. Zhou).

†Huang, J. X. and Huang, W. W. contributed equally and are co-first authors.

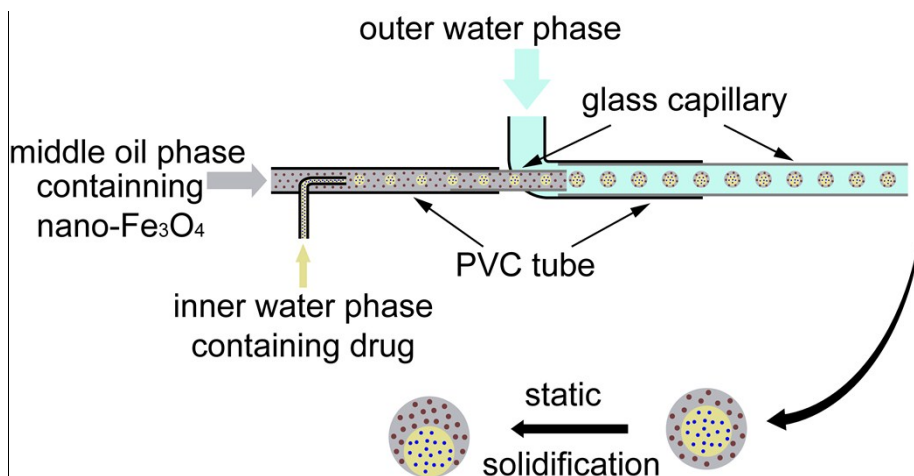

**Figure S1.** Generation of the pH-sensitive eccentric magnetic microcapsules by using a microfluidic device followed by stirring and baking.

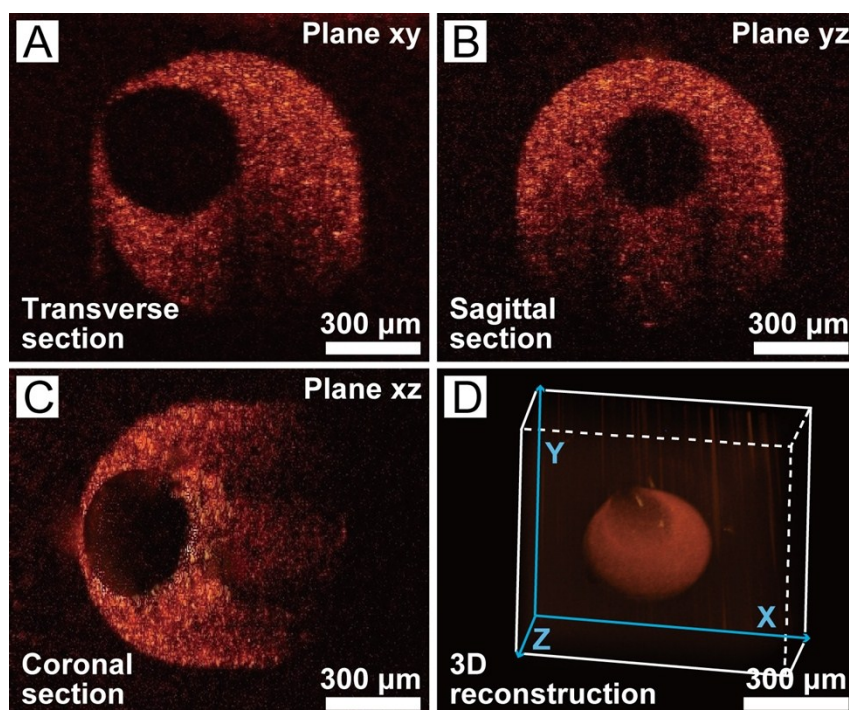

**Figure S2.** Optical coherence tomography (OCT) images of an eccentric magnetic microcapsule in a hydrogel showing the three-dimensional (3D) structure of it. (A) Image of transverse section. (B) Image of sagittal section. (C) Image of coronal section. (D) The 3D reconstructed image.

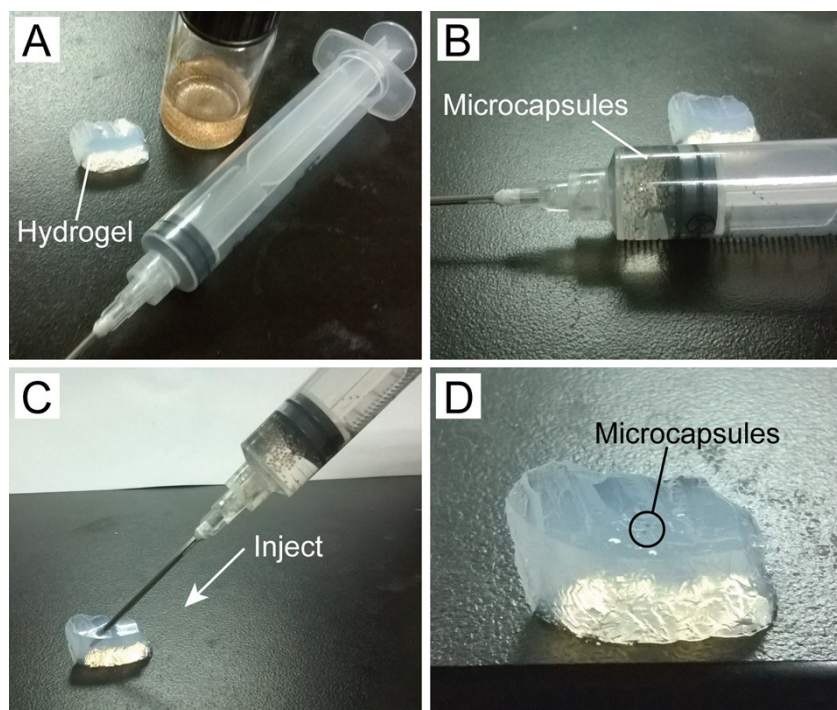

**Figure S3.** Local injection of the eccentric microcapsules into a hydrogel slab.

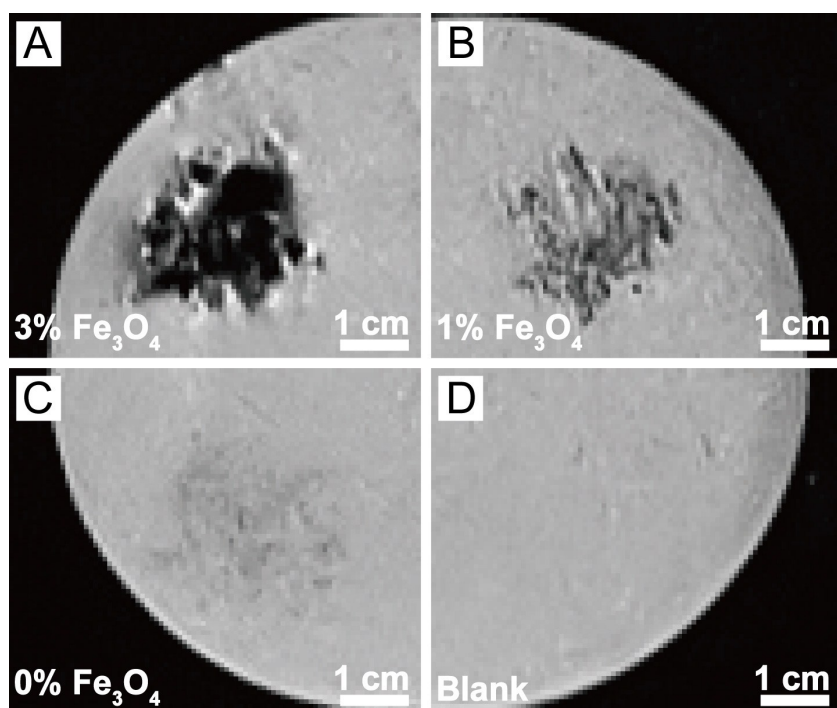

**Figure S4.** MRI images of the eccentric microcapsules with different mass fractions of the magnetic nanoparticles in a hydrogel slab. From (A) to (C), the mass fraction of the magnetic nanoparticles in the microcapsules decreased from 3.0% to 1.0%, and 0%. (D) MRI image of a blank hydrogel slab (without microcapsules).

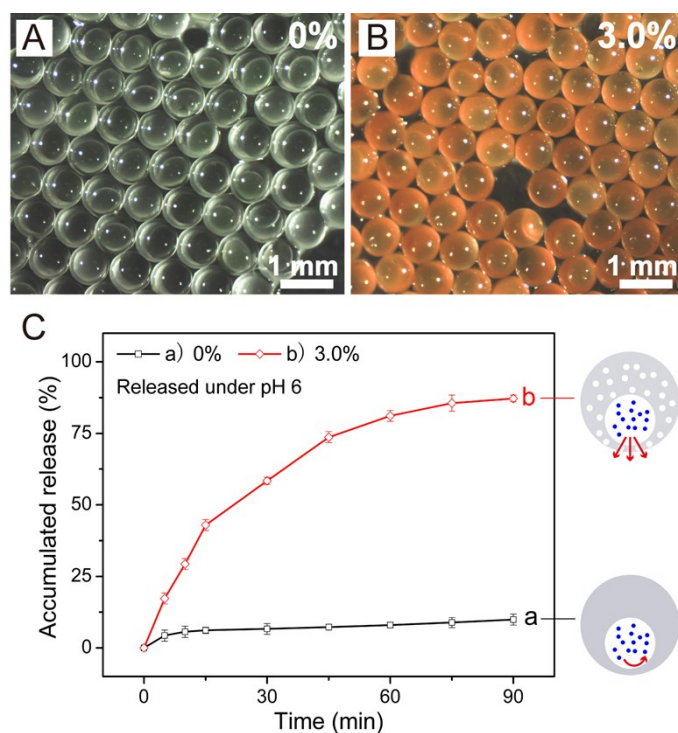

**Figure S5.** Comparison of the drug release profiles between the microcapsules embedded with and without the magnetic nanoparticles ( $\text{Fe}_3\text{O}_4$ ). (A, B) Optical images showing the microcapsules without (A) or with 3.0%  $\text{Fe}_3\text{O}_4$  (B). (C) The release rates of sodium fluorescein from the microcapsules without or with 3.0%  $\text{Fe}_3\text{O}_4$  along with their respective release mechanisms (under pH 6).

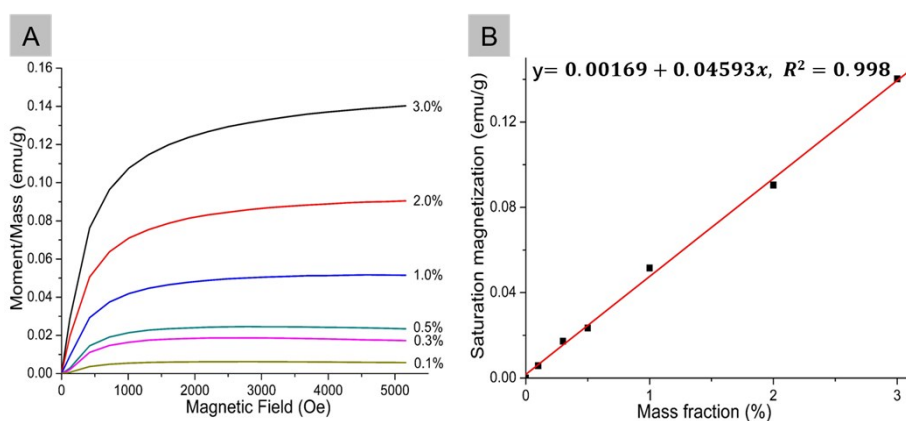

**Figure S6.** Specific saturation magnetization of the EMMs with different mass fractions of  $\text{Fe}_3\text{O}_4$  nanoparticles. (A) Change in specific saturation magnetization for the EMMs containing 0.1%, 0.3%, 0.5%, 1.0%, 2.0%, and 3.0%  $\text{Fe}_3\text{O}_4$  nanoparticles, respectively. (B) The linear fitting for the correlation between specific saturation magnetization and mass fraction of  $\text{Fe}_3\text{O}_4$  nanoparticles.

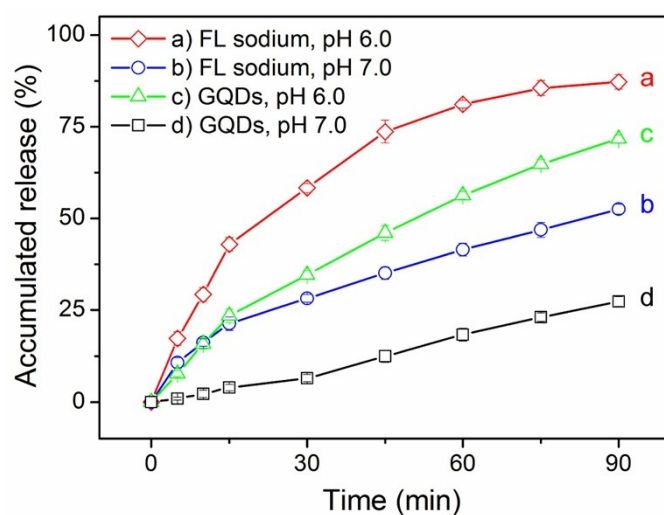

**Figure S7.** Comparison of the release profiles between GQDs and sodium fluorescein under pH 6 and 7.

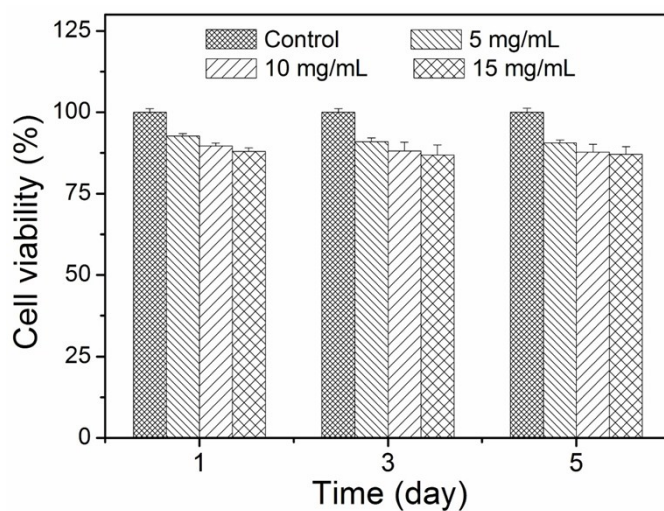

**Figure S8.** Viabilities of HeLa cells treated with different concentrations of the microcapsules for different days evaluated by MTT assay. The cell viabilities were still higher than 80% even after incubation with high concentrations of the microcapsules for 5 days. ( $P > 0.1$ )

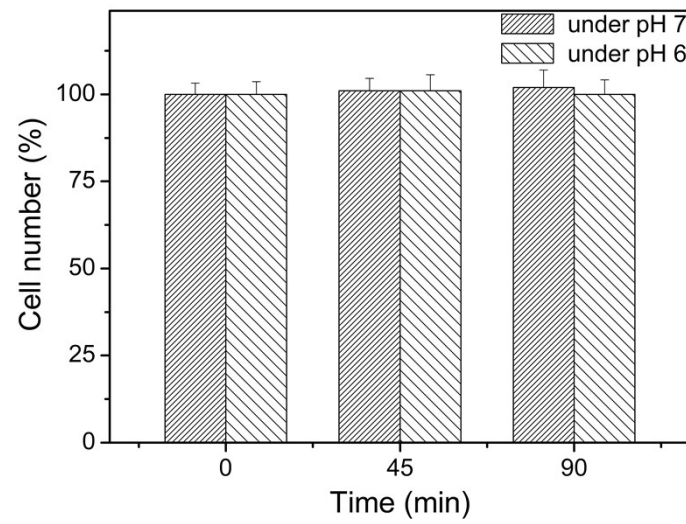

**Figure S9.** Viabilities of GFP-HeLa cells after incubation at two pH conditions for different time intervals.
